# Supplementary material for: Mass balances of Yala and Rikha Samba Glacier, Nepal from 2000 to2017
Source: Copernicus journal article supplement (doi:10.5194/essd-2020-272), 2020-11-17
Supplement: Supplementary file 1 [file essd-2020-272-supplement.pdf]

# Supplement

For manuscript:

Mass balances of Yala and Rikha Samba Glacier, Nepal from 2000 to 2017

- 5 **Table S1: dGPS data collected and its usage for Yala and Rikha Samba Glacier. The accuracy of the dGPS measurements mainly depends on access and measurement duration.**

| <b>Yala Glacier</b>        |                            |                          |                              |
|----------------------------|----------------------------|--------------------------|------------------------------|
| <b>Date</b>                | <b>Product</b>             | <b>Usage</b>             | <b>Accuracy measurements</b> |
| 8.5.2012                   | dGPS (Magellan, ProMark-3) | stake locations          | ±0.3 m                       |
|                            |                            | velocity                 | ±0.4 m                       |
|                            |                            | surface profiles         | ±0.4 m                       |
| 3.11.2012                  | Garmin GPSmap 60CSx        | terminus                 | <10 m                        |
| 6.5.2014                   | dGPS (Topcon)              | stake locations velocity | ±0.3 m                       |
| 5.5.2014                   |                            | terminus                 | ±0.4 m                       |
| 5.5.2014                   |                            |                          | ±1-2 m                       |
| 8.5.2016                   | dGPS (Topcon)              | terminus                 | ±1-3 m                       |
|                            |                            | stake locations          | ±0.3 m                       |
| 25.4.2017                  | dGPS (Topcon)              | stake locations          | ±0.3 m                       |
| <b>Rikha Samba Glacier</b> |                            |                          |                              |
| 30.9.2013                  | dGPS (Topcon)              | terminus                 | ±1-2 m                       |
| 3.10.2013                  |                            | stake locations          | ±0.3 m                       |
| 3-7.10.2015                | dGPS (Topcon)              | stake locations          | ±0.3 m                       |

**Table S2: Maps and data sources evaluated for glacier surface and area change analysis for Yala Glacier. The estimated accuracy of topographic map is based on map scale (e.g. in 1:50,000 map = 50m).**

| <b>Publishing year</b> | <b>Name</b>                              | <b>Map ID</b>            | <b>Scale</b> | <b>Accuracy</b>                                          | <b>Map source</b>                                      | <b>Reference</b>                      | <b>Usage</b>                                                                  |
|------------------------|------------------------------------------|--------------------------|--------------|----------------------------------------------------------|--------------------------------------------------------|---------------------------------------|-------------------------------------------------------------------------------|
| 1965                   | Survey of India Map                      | 71 H/12                  | 1:63,360     | ±48–63 m (estimated)                                     | Aerial photos 1957/58, field surveys; scanned map      | Survey of India                       | Problems with transformation and scale, not used                              |
| 1990                   | Schneider Map / Austrian Alpine Club Map | Langthang Himal Ost 0/11 | 1:50,000     | ±40–50 m (estimated)                                     | Aerial photos 1970/71, field surveys; scanned map      | Kostka et al., 1990                   | Transformation problem, not used                                              |
| 1984                   | GEN map                                  | Yala Glacier             | 1:5,000      | XY: ±4–5 m<br>Z: ±0.45 m (estimated),<br>terminus ~2-3 m | Ground photogrammetry, field surveys 1981; scanned map | Yokoyama, 1984, provided by K. Fujita | Terminus; for area and surface change not used due to transformation problems |
| 1995                   | Nepal Topographic Map/ Finn Map          | 2885-15                  | 1:50,000     | >10 m (estimated)                                        | Aerial photo 1992, field surveys; vector map           |                                       | Transformation problems, not used                                             |
| 2014                   | ICIMOD glacier inventory                 | Yala Glacier             | ~1:50,000    | ±30 m, terminus and outline ±15 m                        | Landsat 7 ETM+, vector map                             | Bajracharya et al. 2014               | Terminus<br>Glacier outlines modified                                         |

11 **Table S3: Overview of used remote sensing data for Yala and Rikha Samba Glacier.**

| Year                       | Sensor               | Scene ID                                       | Geometric resolution                       | Usage                                              |
|----------------------------|----------------------|------------------------------------------------|--------------------------------------------|----------------------------------------------------|
| <b>Yala Glacier</b>        |                      |                                                |                                            |                                                    |
| 23.11.1974                 | Hexagon KH-9         | DZB1209-500101L006001<br>DZB1209-500101L007001 | ±7.6 m (varying from 6<br>– 9 m)           | Frontal variations                                 |
| 2000                       | SRTM3                | 2128125658                                     | ±90 m                                      | DEM (SRTM-3)<br>GCP generation (z)                 |
| Feb 2000                   | Landsat 7 ETM+       |                                                | ±30 m                                      | Frontal variations<br>Glacier outline              |
| 15.1.2012                  | GeoEye-1<br>(stereo) | 201201150500576160303<br>1609567               | ±0.5 m (Pan)<br>±1.65 m<br>(Multispectral) | DEM (DEM2012)<br>Orthoimage for glacier<br>outline |
| 2013                       | Landsat-8            | LC81410402013322LGN0<br>0                      | ±15 m (Pan)<br>±30 m (Multispectral)       | GCP generation (x,y)                               |
| <b>Rikha Samba Glacier</b> |                      |                                                |                                            |                                                    |
| 7.3.1989                   | Landsat MSS 4        |                                                | ±60 m                                      | Terminus                                           |
| 2000                       | SRTM1                | SRTM_53_07<br>SRTM_54_07                       | ±30 m                                      | DEM, voids filled with<br>SRTM3 data               |
| 29.9.2001                  | Landsat 7 ETM+       |                                                | ±30 m                                      | Terminus                                           |
| 7.2.2006                   | Landsat 5 TM         |                                                | ±30 m                                      | Terminus                                           |
| 25.4.2010<br>27.4.2010     | RapidEye             | 4452325_2010-04-25<br>4452325_2010-04-27       | ±5 m                                       | Outline                                            |
| 5.2.2011                   | Landsat 5 TM         |                                                | ±30 m                                      | Terminus                                           |

12
